# Supplementary material
Source: HighWire-hosted journal article supplement (https://www.annfammed.org/highwire/filestream/8015/field_highwire_adjunct_files/2/FAppendix_3.pdf)
Supplement: FAppendix_3.pdf [file FAppendix_3.pdf]

Fernald DH, Pace WD, Harris DM, West DR, Main DS, Westfall JM. Event reporting to a primary care patient safety reporting system: a report from the ASIPS Collaborative. *Ann Fam Med.* 2004;2:327-332.

<http://www.annfammed.org/cgi/content/full/2/4/327/DC1>

---

### Appendix 3. Chi-square *P* Value for Cross-Tabulation of Type of Report and Harm Categories

| Harm Category                   | Completed Confidential Reports | All Confidential Reports |
|---------------------------------|--------------------------------|--------------------------|
|                                 | <i>P</i> Value                 | <i>P</i> Value           |
| Clinical harm now               | .6953                          | .9297                    |
| Increased risk of clinical harm | .2596                          | .5331                    |
| Nonclinical harm                | .1941                          | .4017                    |
| Unstable                        | .0446                          | .0617                    |
| No known harm                   | .4089                          | .3447                    |
